# Supplementary material for: Preparation and characterization of nanofibrous metal–organic frameworks as efficient catalysts for the synthesis of cyclic carbonates in solvent-free conditions
Source: Royal Society of Chemistry journal article supplement (doi:10.1039/d1dt01336j), 2021-01-01
Supplement: d1dt01336j1.pdf [file d1dt01336j1.pdf]

## **Preparation and Characterization of Nanofibrous Metal–Organic Frameworks as Efficient Catalysts for Synthesis of Cyclic Carbonates in the Solvent Free Conditions**

Razieh Mirzaei<sup>a</sup>, Mehrnaz Bahadori<sup>a</sup>, Reihaneh Kardanpour<sup>a</sup>, Sara Rafiei<sup>a</sup>, Shahram Tangestaninejad\*<sup>a</sup>, Majid Moghadam\*<sup>a</sup>, Valiollah Mirkhani\*<sup>a</sup>, Iraj Mohammadpoor-Baltork<sup>a</sup>, Seyed Erfan Mirazimi<sup>b</sup>

<sup>a</sup> *Department of Chemistry, Catalysis Division, University of Isfahan, Isfahan 81746-73441,*

<sup>b</sup> *Laboratory for Mechanical and Physical Properties of Solids, Central Laboratory of Isfahan University*

## **1. Sample preparation**

### **1.1. Synthesis of UiO-66**

Briefly, terephthalic acid (0.327 g) and  $ZrCl_4$  (0.512 g) were mixed with DMF (25 mL) in a Teflon-lined bomb. The Teflon-lined bomb was then sealed and placed in an oven at 120 °C for 24 h. The final product was collected by centrifuging and washed successively with DMF and methanol several times. Finally, the UiO-66 particles were evacuated in vacuum at 100 °C for 12 h.

### **1.2. Synthesis of ZIF-67**

2-methylimidazole (1.64 g) was dissolved in 2 mL deionized water and followed the addition of an aqueous  $Co(NO_3)_2 \cdot 6H_2O$  solution (0.291 g in 2 mL deionized water) with stirring. Purple colored product was formed immediately at room temperature. Stirring kept for 2 hours and then the resulted purple powder filtered and washed with deionized water and ethanol 3 times and then kept for drying in the oven at 80°C overnight under vacuum.

## **2. Study of the electrospinning parameters:**

For improving the fibers performances, different processing parameters such as voltage, the distance from needle to collector, PVA weight fraction in solution and MOF weight fraction relative to the polymer were optimized. The results are summarized in Table S1. As seen the best fibers were prepared with a concentration of 9% in water for PVA and 50% in DMF for PS. In the case of PVA, in concentrations of less than 9%, because of the low viscosity, the solvent was trapped into the fibers and knotted fibers were prepared and in concentrations of higher than 9%, the solution could not be passed through the needle. When the distance between the needle and the collector was 10 cm, the solvent has not enough time to evaporate, and therefore knotty fibers were obtained. For distances more than 15 cm, the electrospinning jet could not reach the collector, and no fibers were prepared.

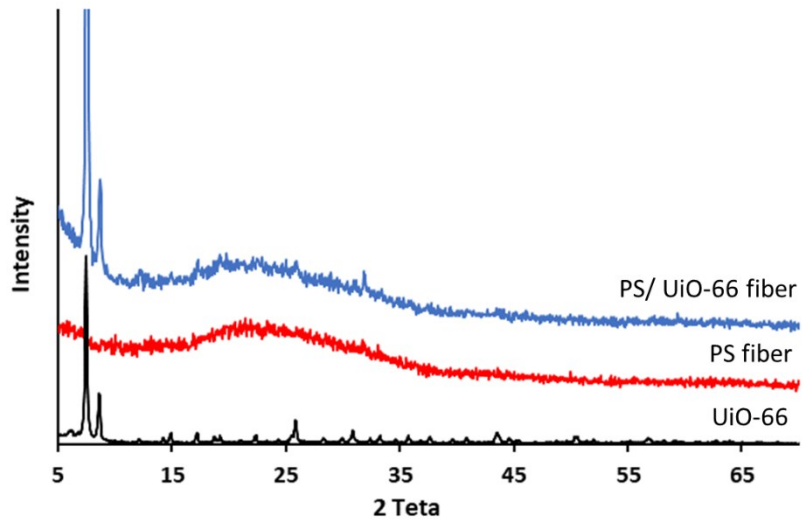

Figure S1: XRD patterns of UiO-66, PS fiber and PS-UiO-66 fiber.

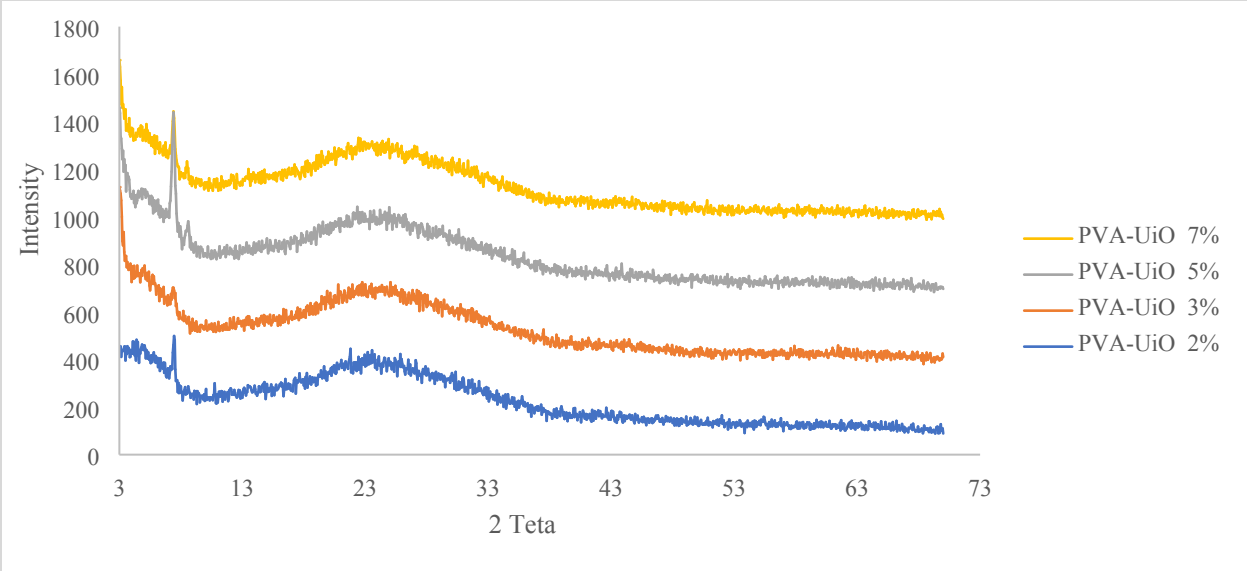

Figure S2: The XRD patterns of PVA/UiO-66 composites with different feeding weight ratio of UiO-66

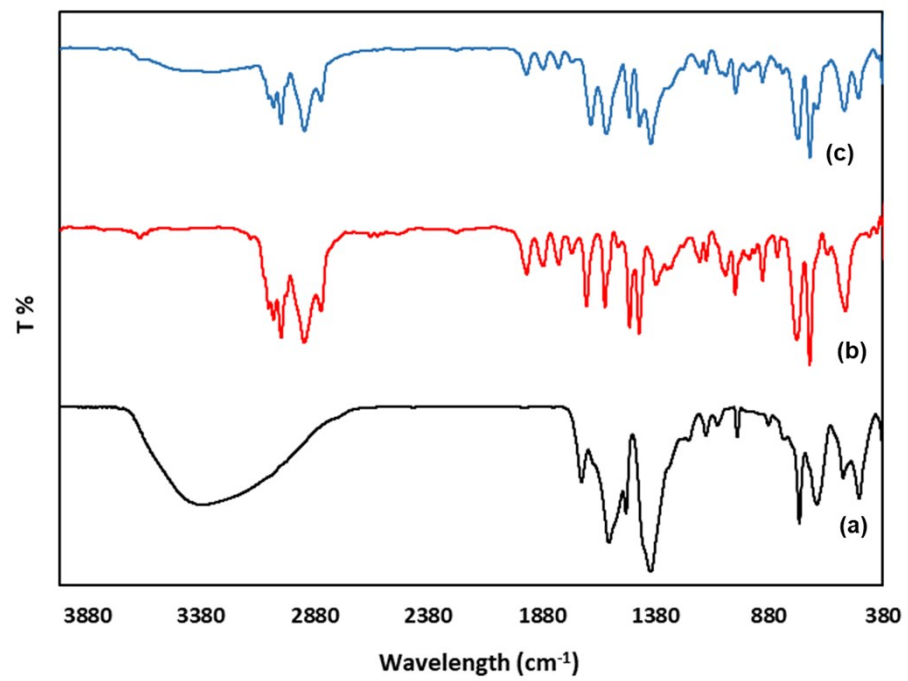

Figure S3: FT-IR spectra of (a) UiO-66, (b) PS fiber and (c) PS/UiO-66 fiber.

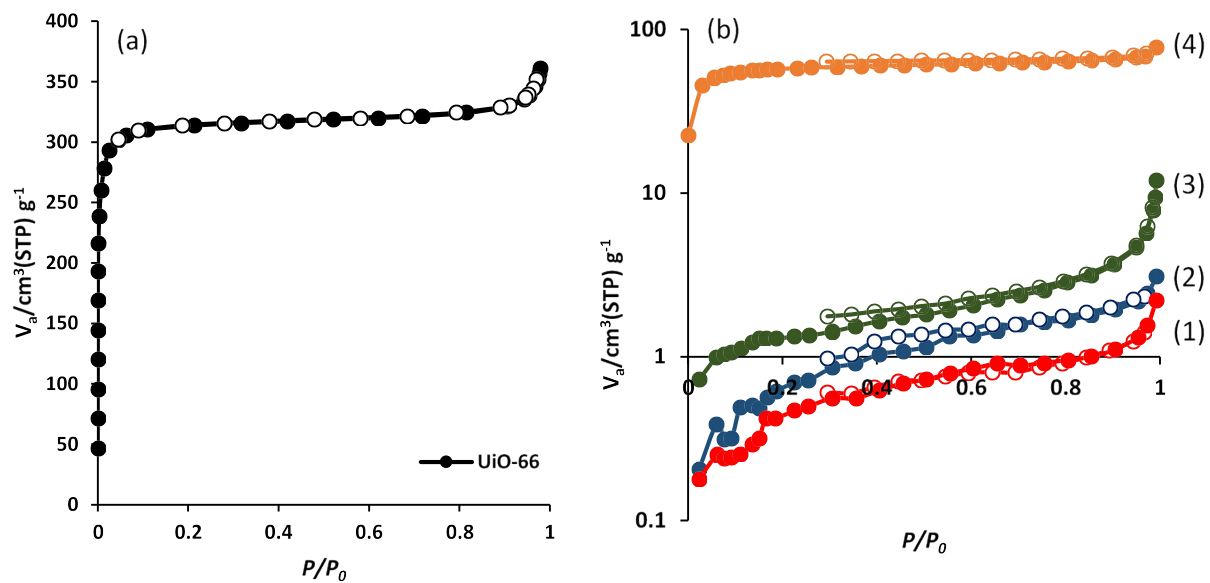

Figure S4: (a)  $\text{N}_2$  isotherms of UiO-66 and (b)  $\text{N}_2$  adsorption and desorption of (1) Ps fiber, (2) PS/UiO-66 fiber, (3) PVA fiber and (4) PVA/UiO-66 fiber ( $\bullet$  = sorption,  $\circ$  = desorption).

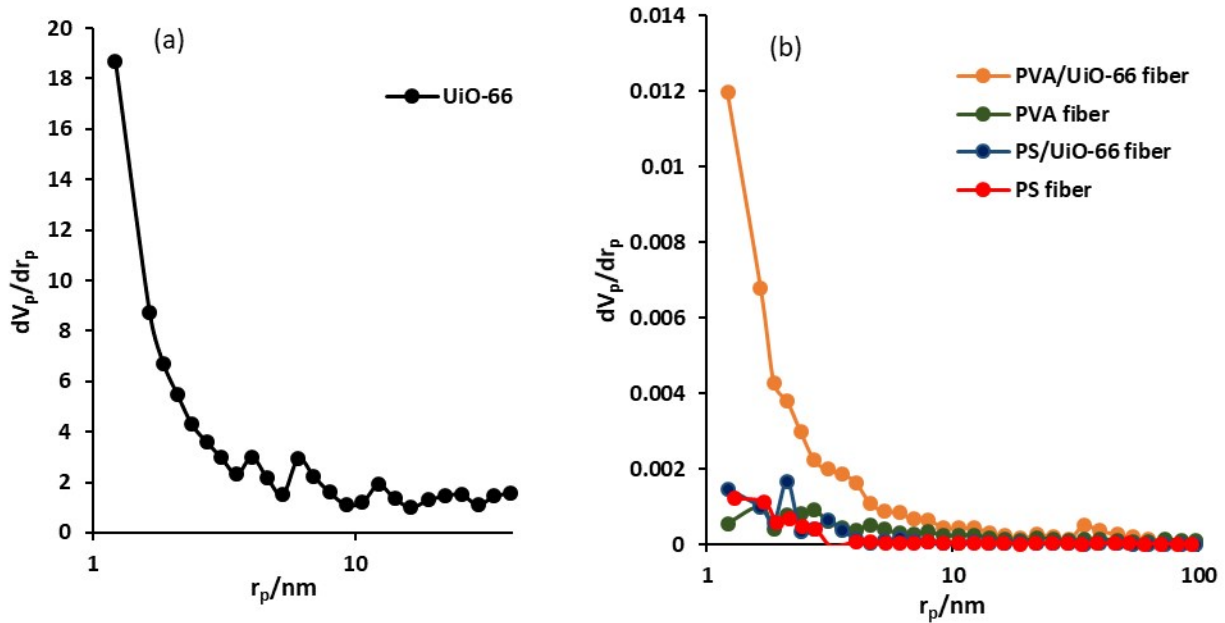

Figure S5: BJH plots of (a) UiO-66 and (b) PS fiber, PS/UiO-66 fiber, PVA fiber and PVA/UiO-66 fiber

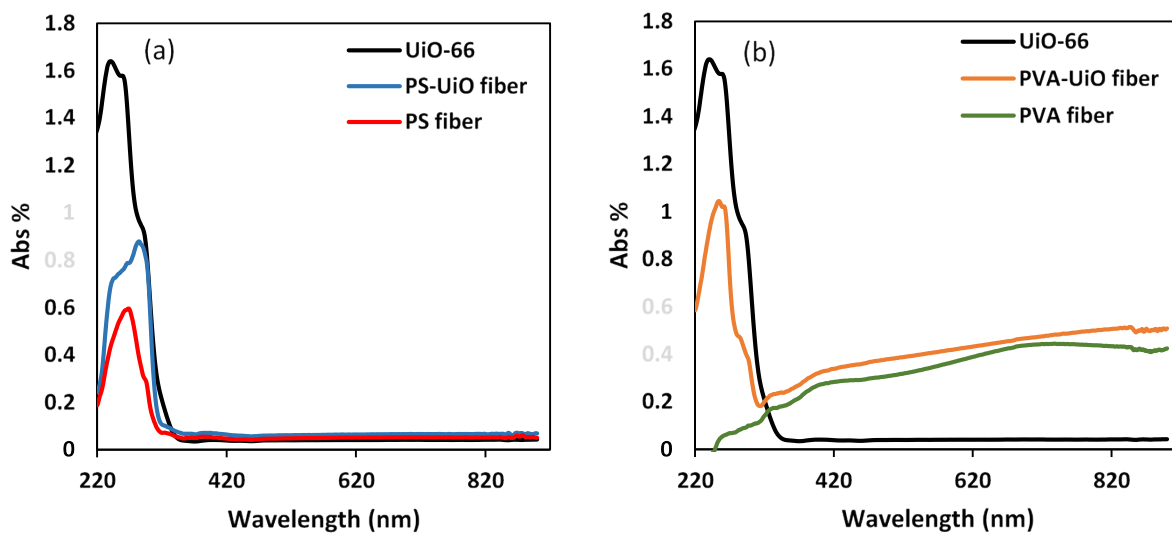

Figure S6: UV-Vis spectra of UiO-66, PS fiber, PS/UiO-66 fiber, PVA fiber and PVA/UiO-66 fiber.



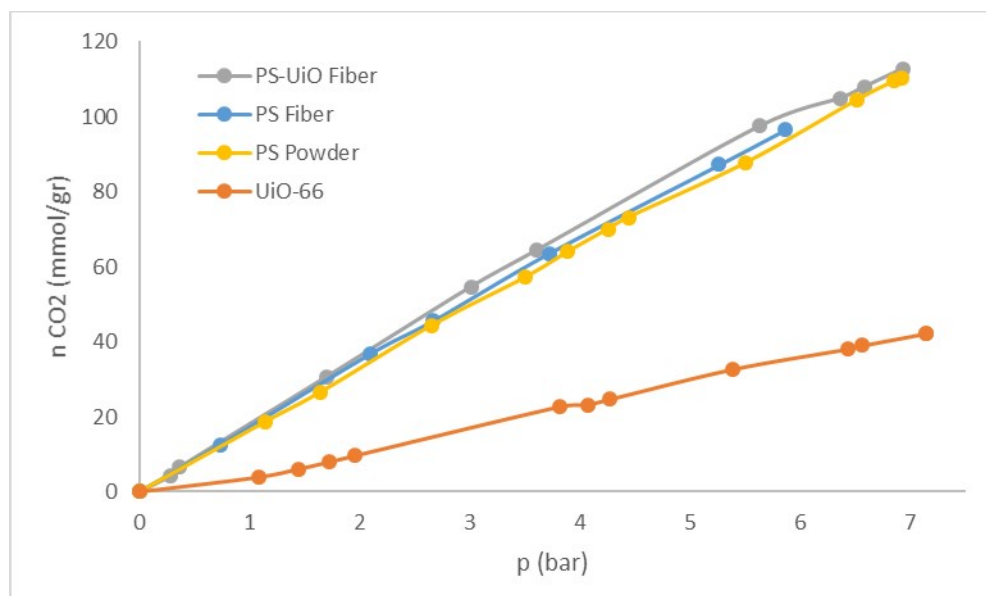

**Figure S7.** CO<sub>2</sub> adsorption capacity of UiO-66, PS powder, PS fiber and PS/UiO-66 fiber at 298.2 K.

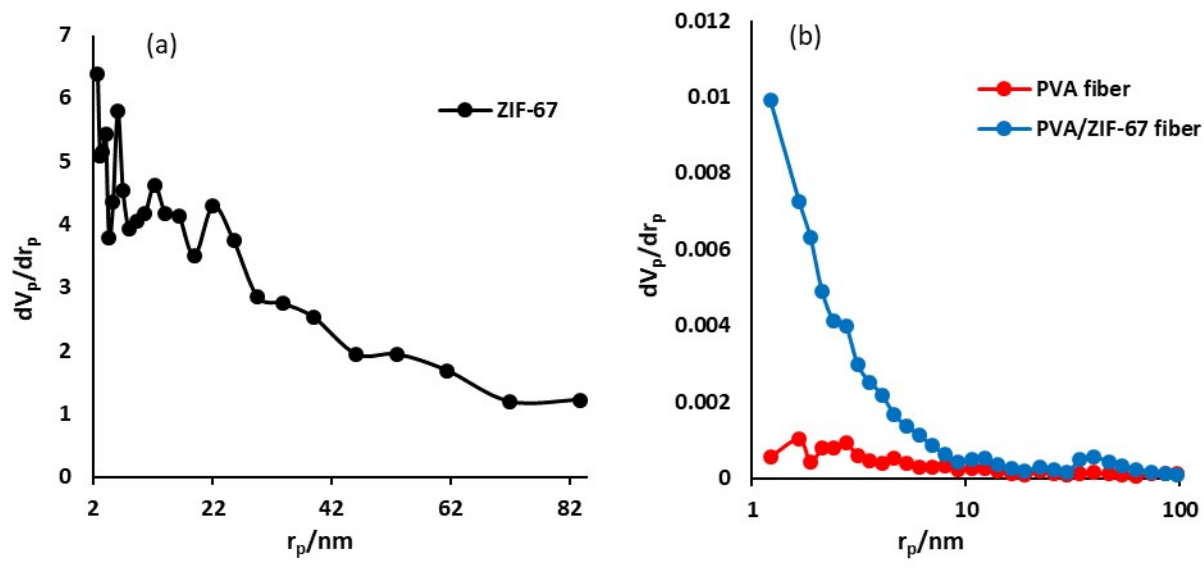

Figure S8: BJH plots of (a) ZIF-67 and (b) PVA fiber and PVA/ZIF-67 fiber.

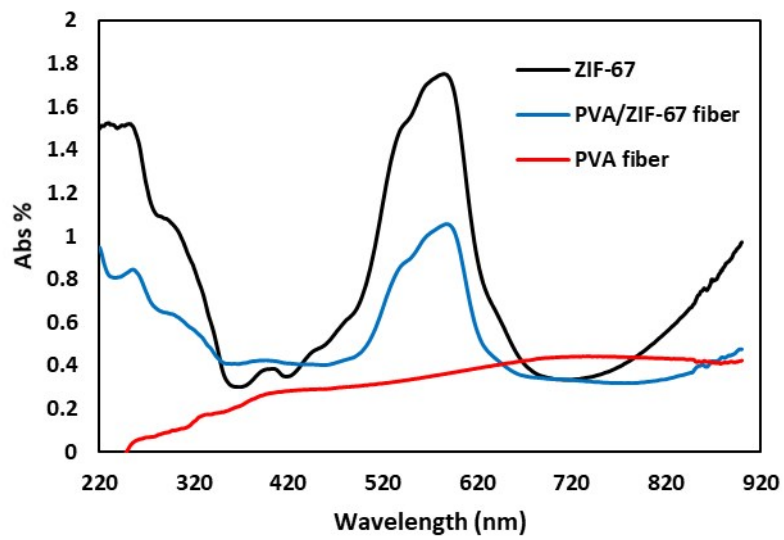

Figure S9: UV-Vis spectra of ZIF-67 fiber, PVA fiber and PVA/ZIF-67 fiber.

Table S1. Optimization of electrospinning parameters

|                                                          | PVA/UiO-66 & PVA/ZIF-67 | PS/UiO-66                         |
|----------------------------------------------------------|-------------------------|-----------------------------------|
| Applied voltage (kV)                                     | 10, <u>15</u> , 20      | 10, 15, 18, <u>20</u> , 22        |
| Flow rate (mL/h)                                         | 0.3, <u>0.5</u> , 0.8   | 0.5, 1, <u>2</u> , 3              |
| Collection distance (cm)                                 | 10, 12, <u>15</u> , 20  | 10- <u>15</u> - 20                |
| PVA weight fraction in solution (%)                      | 5, 7, <u>9</u> , 12     | 5, 10, 20, 30, 40, <u>50</u> , 60 |
| MOF weight fraction relative to the polymer solution (%) | 2, 3, <u>5</u> , 7      | 3, 5, 7, <u>8</u> , 10            |

Table S2: Sorption data for UiO-66, PS fiber, PS/UiO-66 fiber, PVA fiber and PVA/UiO-66 fiber

| Sample           | $S_{\text{BET}}$ ( $\text{m}^2 \text{g}^{-1}$ ) | Total pore volume<br>( $P/P_0=0.990$ ) ( $\text{cm}^3 \text{g}^{-1}$ ) | Mean pore diameter<br>(nm) |
|------------------|-------------------------------------------------|------------------------------------------------------------------------|----------------------------|
| UiO-66           | 1315.5                                          | 0.5585                                                                 | 1.6983                     |
| PS fiber         | 1.6536                                          | 0.0032871                                                              | 7.9514                     |
| PS/UiO-66 fiber  | 3.0412                                          | 0.0046288                                                              | 6.0881                     |
| PVA fiber        | 4.8378                                          | 0.015581                                                               | 12.883                     |
| PVA/UiO-66 fiber | 220.96                                          | 0.1181                                                                 | 2.1372                     |

Table S3: Cycloaddition of CO<sub>2</sub> to styrene epoxide<sup>a</sup>

| Catalyst             | Amount (mg) | Conversion <sup>b</sup> (%) | Selectivity <sup>b</sup> (%) |
|----------------------|-------------|-----------------------------|------------------------------|
| -                    | -           | 43                          | 65                           |
| UiO-66 powder        | 40          | 66                          | 71                           |
| PS powder            | 40          | 39                          | 73                           |
| PS fiber             | 40          | 50                          | 78                           |
| PS/UiO-66 fiber      | 40          | 65                          | 72                           |
| PS/UiO-66 fiber      | 80          | 93                          | 83                           |
| PVA powder           | 40          | 40                          | 67                           |
| PVA fiber            | 40          | 43                          | 81                           |
| PVA/(5%)UiO-66 fiber | 40          | 65                          | 70                           |
| PVA/(5%)UiO-66 fiber | 80          | 90                          | 84                           |
| PVA/(2%)UiO-66 fiber | 80          | 50                          | 58                           |
| PVA/(3%)UiO-66 fiber | 80          | 45                          | 55                           |
| PVA/(7%)UiO-66 fiber | 80          | 40                          | 49                           |

<sup>a</sup>Reaction condition: Styrene epoxide (10 mmol), P<sub>CO<sub>2</sub></sub> (2.0 MPa), TBABr (0.3 gr) and T (120 °C) for 4h.

<sup>b</sup>Yields were determined by GC analysis.

Table S4: Conditions optimization of cycloaddition of CO<sub>2</sub> to styrene epoxide catalyzed by PVA/UiO-66 fiber

| entry | Catalyst (mg) | time (h) | T (°C) | Epoxide (mmol) | P <sub>CO2</sub> (bar) | TBABr (mg) | Conv. <sup>a</sup> (%) | Sel. <sup>a</sup> (%) |
|-------|---------------|----------|--------|----------------|------------------------|------------|------------------------|-----------------------|
| 1     | 30            | 4        | 120    | 10             | 20                     | 300        | 63                     | 78                    |
| 2     | 60            | 4        | 120    | 10             | 20                     | 300        | 81                     | 82                    |
| 3     | 80            | 4        | 120    | 10             | 20                     | 300        | 91                     | 84                    |
| 4     | 100           | 4        | 120    | 10             | 20                     | 300        | 85                     | 79                    |
| 5     | 80            | 3        | 120    | 10             | 20                     | 300        | 75                     | 75                    |
| 6     | 80            | 4        | 120    | 10             | 20                     | 300        | 91                     | 83                    |
| 7     | 80            | 5        | 120    | 10             | 20                     | 300        | 82                     | 84                    |
| 8     | 80            | 4        | 90     | 10             | 20                     | 300        | 50                     | 78                    |
| 9     | 80            | 4        | 100    | 10             | 20                     | 300        | 84                     | 83                    |
| 10    | 80            | 4        | 110    | 10             | 20                     | 300        | 87                     | 74                    |
| 11    | 80            | 4        | 120    | 10             | 20                     | 300        | 91                     | 83                    |
| 12    | 80            | 4        | 130    | 10             | 20                     | 300        | 85                     | 81                    |
| 13    | 80            | 4        | 120    | 7              | 20                     | 300        | 73                     | 82                    |
| 14    | 80            | 4        | 120    | 10             | 20                     | 300        | 91                     | 84                    |
| 15    | 80            | 4        | 120    | 13             | 20                     | 300        | 74                     | 81                    |
| 16    | 80            | 4        | 120    | 10             | 14                     | 300        | 76                     | 82                    |
| 17    | 80            | 4        | 120    | 10             | 16                     | 300        | 82                     | 83                    |
| 18    | 80            | 4        | 120    | 10             | 20                     | 300        | 91                     | 83.5                  |
| 19    | 80            | 4        | 120    | 10             | 24                     | 300        | 86                     | 83.5                  |
| 20    | 80            | 4        | 120    | 10             | 20                     | 25         | 87                     | 95                    |
| 21    | 80            | 4        | 120    | 10             | 20                     | 50         | 95                     | 94                    |
| 22    | 80            | 4        | 120    | 10             | 20                     | 100        | 91                     | 91                    |
| 23    | 80            | 4        | 120    | 10             | 20                     | 200        | 90                     | 85                    |
| 24    | 80            | 4        | 120    | 10             | 20                     | 300        | 91                     | 84                    |

<sup>a</sup>Yields were determined by GC analysis.

Table S5: Conditions optimization of cycloaddition of CO<sub>2</sub> to styrene epoxide catalyzed by PS/UiO-66 fiber<sup>a</sup>

| entry | T (°C) | TBABr (mg) | Conversion <sup>b</sup> (%) | Selectivity <sup>b</sup> (%) |
|-------|--------|------------|-----------------------------|------------------------------|
| 1     | 90     | 300        | 72                          | 80                           |
| 2     | 100    | 300        | 81                          | 84                           |
| 3     | 110    | 300        | 86                          | 81                           |
| 4     | 120    | 300        | 94                          | 83                           |
| 5     | 130    | 300        | 86                          | 82                           |
| 6     | 120    | 200        | 87                          | 85                           |
| 7     | 120    | 300        | 94                          | 83                           |
| 8     | 120    | 400        | 88                          | 81                           |

<sup>a</sup>Reaction condition: Catalyst =80 mg, epoxide=10 mmol, P<sub>CO<sub>2</sub></sub>=20 bar, for 4 h.

<sup>b</sup>Yields were determined by GC analysis.



Table S6: Sorption data for ZIF-67, PVA fiber and PVA/ZIF-67 fiber.

| Sample           | $S_{\text{BET}}$ ( $\text{m}^2 \text{g}^{-1}$ ) | Total pore volume<br>( $P/P_0=0.990$ )<br>( $\text{cm}^3 \text{g}^{-1}$ ) | Mean pore diameter<br>(nm) |
|------------------|-------------------------------------------------|---------------------------------------------------------------------------|----------------------------|
| ZIF-67           | 260.91                                          | 0.3284                                                                    | 5.0348                     |
| PVA fiber        | 4.8378                                          | 0.015581                                                                  | 12.883                     |
| PVA/ZIF-67 fiber | 115.47                                          | 0.084734                                                                  | 2.9352                     |

Table S7: Conditions optimization of cycloaddition of CO<sub>2</sub> to styrene epoxide catalyzed by PVA/ZIF-67 fiber

| entry | Catalyst (mg) | time (h) | Epoxide (mmol) | TBABr (mg) | T (°C) | P <sub>CO2</sub> (bar) | Conv. <sup>a</sup> (%) | Sel. <sup>a</sup> (%) |
|-------|---------------|----------|----------------|------------|--------|------------------------|------------------------|-----------------------|
| 1     | 20            | 6        | 25             | 300        | 120    | 10                     | 95                     | 82                    |
| 2     | 30            | 6        | 25             | 300        | 120    | 10                     | 91                     | 89                    |
| 3     | 60            | 6        | 25             | 300        | 120    | 10                     | 88                     | 89                    |
| 4     | 80            | 6        | 25             | 300        | 120    | 10                     | 90                     | 86                    |
| 5     | 30            | 2        | 25             | 300        | 120    | 10                     | 84                     | 88                    |
| 6     | 30            | 3        | 25             | 300        | 120    | 10                     | 91                     | 89                    |
| 7     | 30            | 4        | 25             | 300        | 120    | 10                     | 88                     | 89                    |
| 8     | 30            | 5        | 25             | 300        | 120    | 10                     | 88                     | 87                    |
| 9     | 30            | 3        | 15             | 300        | 120    | 10                     | 85                     | 83                    |
| 10    | 30            | 3        | 20             | 300        | 120    | 10                     | 94                     | 88                    |
| 11    | 30            | 3        | 25             | 300        | 120    | 10                     | 91                     | 88                    |
| 12    | 30            | 3        | 20             | 50         | 120    | 10                     | 74                     | 94                    |
| 13    | 30            | 3        | 20             | 100        | 120    | 10                     | 91                     | 91                    |
| 14    | 30            | 3        | 20             | 200        | 120    | 10                     | 90                     | 91                    |
| 15    | 30            | 3        | 20             | 300        | 120    | 10                     | 74                     | 88                    |
| 16    | 30            | 3        | 20             | 100        | 110    | 10                     | 75                     | 92                    |
| 17    | 30            | 3        | 20             | 100        | 120    | 10                     | 90                     | 91                    |
| 18    | 30            | 3        | 20             | 100        | 130    | 10                     | 91                     | 84                    |
| 19    | 30            | 3        | 20             | 100        | 120    | 6                      | 87                     | 93                    |
| 20    | 30            | 3        | 20             | 100        | 120    | 8                      | 86                     | 95                    |
| 21    | 30            | 3        | 20             | 100        | 120    | 10                     | 90                     | 91                    |
| 22    | 30            | 3        | 20             | 100        | 120    | 15                     | 88                     | 92                    |

<sup>a</sup>Yields were determined by GC analysis.
